# Supplementary material for: Unilateral Optic Nerve Sheath Fenestration in Idiopathic Intracranial Hypertension: A 6-Month Follow-Up Study on Visual Outcome and Prognostic Markers
Source: MDPI journal article supplement (doi:10.3390/life11080778), 2021-07-31

# Supplemental data 2: Optic nerve head structure

Operated eye: Maximum optic nerve head elevation data with linear regression

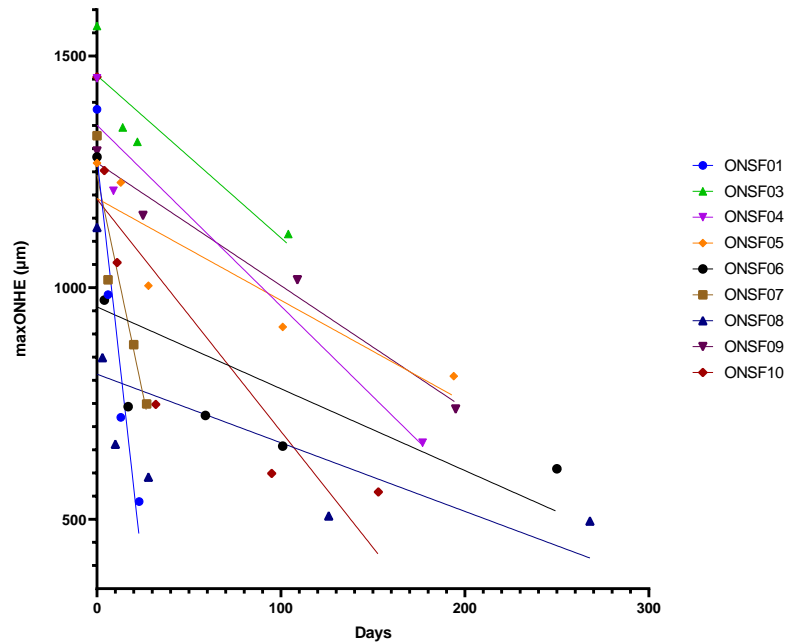

Fellow eye: Maximum optic nerve head elevation data with linear regression

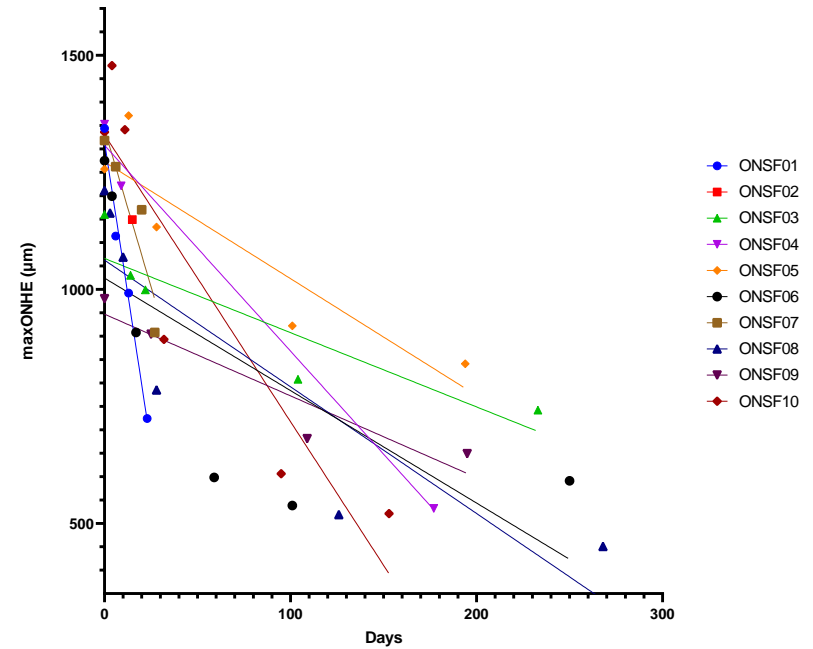

Operated eye: Papilledema grade data with linear regression

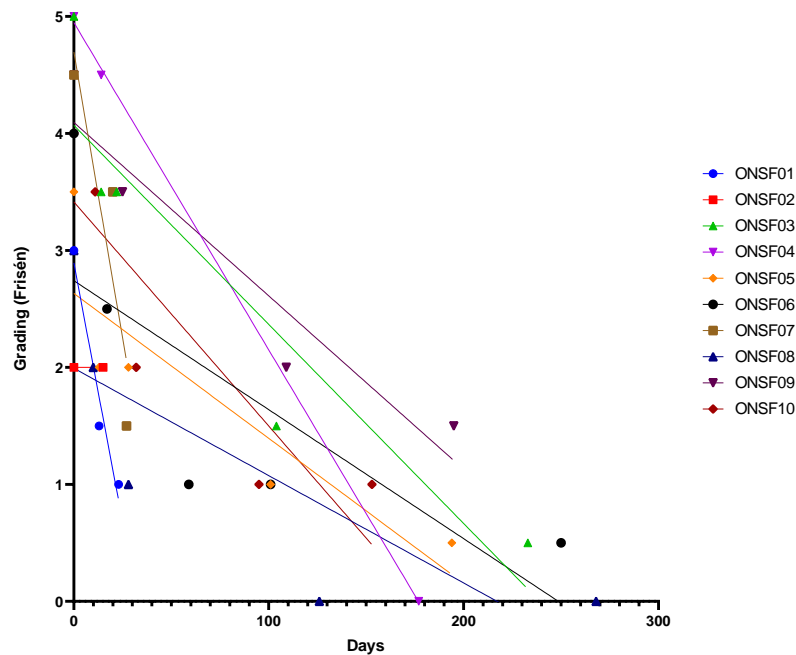

Fellow eye: Papilledema grade data with linear regression

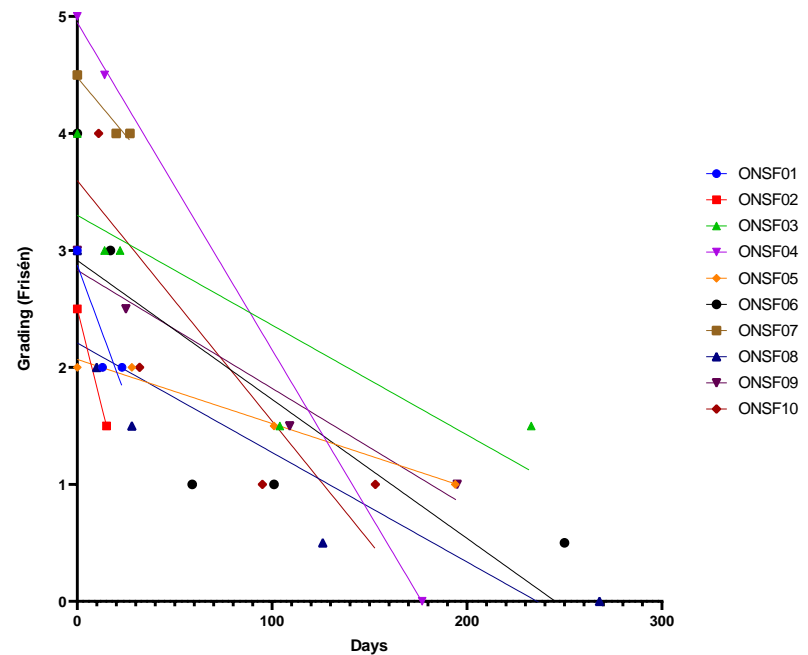

Supplement: s1 [file s1]
