# Supplementary figures and images for: Unilateral Optic Nerve Sheath Fenestration in Idiopathic Intracranial Hypertension: A 6-Month Follow-Up Study on Visual Outcome and Prognostic Markers
Source: MDPI journal article supplement (doi:10.3390/life11080778), 2021-07-31

# Supplemental data 3: Correlations

- Operated eye
- Fellow eye

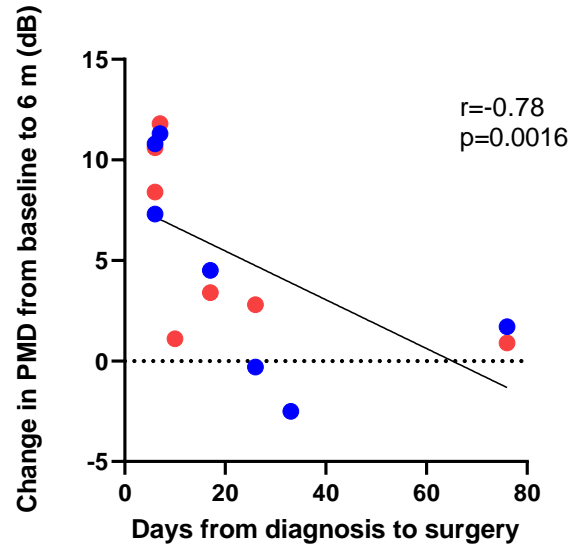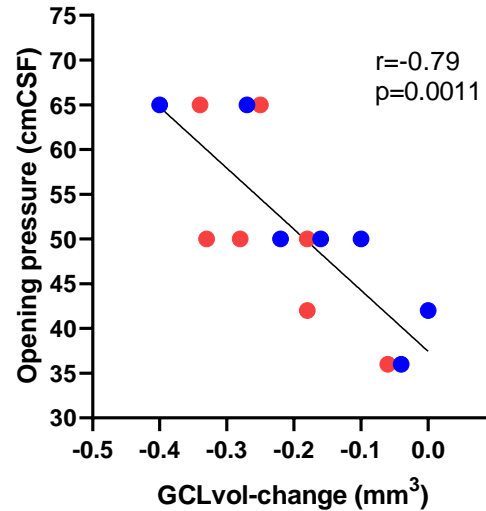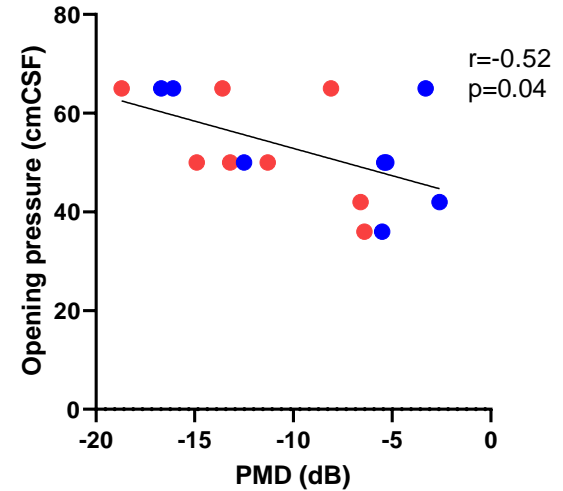

Supplement: s1 [file s1]
